# Supplementary material for: SLC3A2 promotes tumor‐associated macrophage polarization through metabolic reprogramming in lung cancer
Source: PubMed Central journal article supplement — Cancer Sci. 2023 Mar 6;114(6):2306–17. doi: 10.1111/cas.15760 (PMC10236635; doi:10.1111/cas.15760), 2023-03-06

## Supplementary figure 1: Cell expressing SLC3A2 in tumor immune microenvironment

(A) Representative overlay of multiple digital fluorescent images of SLC3A2 and  $\alpha$ -Smooth muscle actin ( $\alpha$ -SMA, a marker for myofibroblasts), demonstrating SLC3A2 staining (green),  $\alpha$ -SMA staining (red), and the combination of the two (black). (B) Representative overlay of multiple digital fluorescent images of SLC3A2 and CD3 (a marker for T cells), demonstrating SLC3A2 staining (green), CD3 staining (red), and their combination (black). (C) Representative overlay of multiple digital fluorescent images of SLC3A2 and CD20 (a marker for B cells), demonstrating SLC3A2 staining (green), CD20 staining (red), and both combined (black). (D) Representative overlay of multiple digital fluorescent images of SLC3A2 and CD68 (a marker for macrophages), demonstrating SLC3A2 staining (green), CD68 staining (red), and their combination (black). Scale bar, 50  $\mu$ m, n=51.

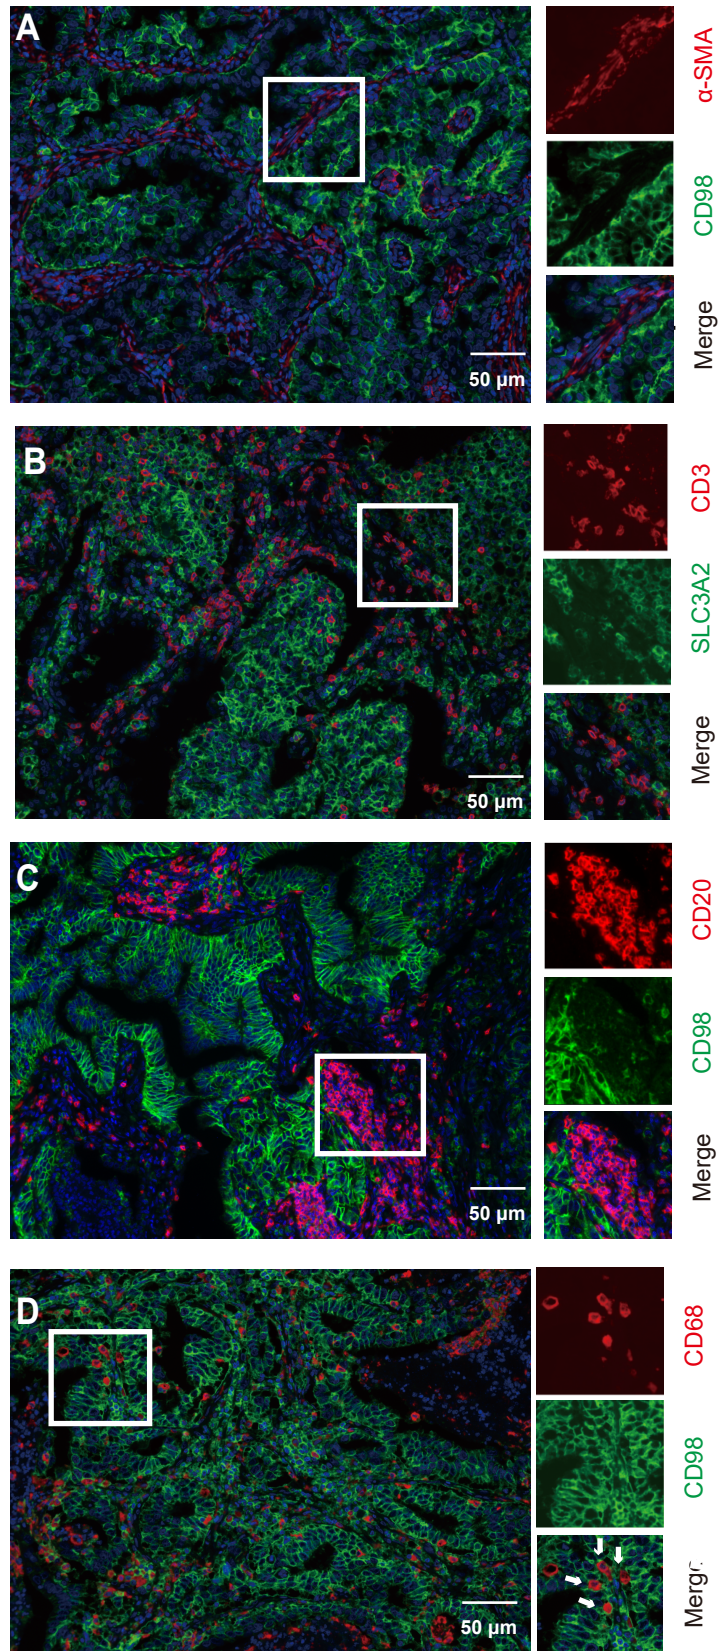

Supplement: CAS-114-2306-s002.pdf [file CAS-114-2306-s002.pdf]
